# Supplementary material for: A rapid field-ready electrical biosensor consisting of bismuthine-derived Au island decorated BiOCl nanosheets for Raphidiopsis raciborskii detection in freshwater
Source: Royal Society of Chemistry journal article supplement (doi:10.1039/d4tb01624f), 2024-01-01
Supplement: d4tb01624f1.pdf [file d4tb01624f1.pdf]

## Supporting information

### Rapid field-ready electrical biosensor consisting of bismuthine-derived Au island decorated BiOCl nanosheets for *Raphidiopsis raciborskii* detection in freshwater

Hyunjun Park<sup>a,†</sup>, Sun Woo Kim<sup>b,†</sup>, Siyun Lee<sup>a</sup>, Jeongyun An<sup>a</sup>, Seokho Jung<sup>a</sup>, Minju Lee<sup>c</sup>,  
Jeonghyun Kim<sup>c</sup>, Daeryul Kwon<sup>d</sup>, Hongje Jang<sup>b,\*</sup>, and Taek Lee<sup>a,\*</sup>

<sup>a</sup> Department of Chemical Engineering, Kwangwoon University, 20 Gwangwoon-Ro, Nowon-Gu, Seoul 01897, Republic of Korea

<sup>b</sup> Department of Chemistry, Kwangwoon University, 20 Gwangwoon-Ro, Nowon-Gu, Seoul 01897, Republic of Korea

<sup>c</sup> Department of Electronics Convergence Engineering, Kwangwoon University, 20 Gwangwoon-Ro, Nowon-Gu, Seoul 01897, Republic of Korea

<sup>d</sup> Protist Research Division, Biological Resources Research Department, Nakdonggang National Institute of Biological Resources (NNIBR), 137, Donam 2-gil, Sangju-si, Gyeongsangbuk-do 37242, Republic of Korea

† These authors contributed equally to this work

#### Corresponding Author

\*Hongje Jang. Phone: +82-2-940-8320. E-mail: hjang@kw.ac.kr

\*Taek Lee. Phone: +82-2-940-5771. E-mail: tlee@kw.ac.kr

## Table of contents

|                                                                                                                          |     |
|--------------------------------------------------------------------------------------------------------------------------|-----|
| 1. Electron microscopic characterization of synthesized bismuthene (Figure S1) .....                                     | S3  |
| 2. Lower magnification images for Au-BiOCl (Figure S2) .....                                                             | S3  |
| 3. Optical characterization of bismuthene and Au-BiOCl (Figure S3) .....                                                 | S4  |
| 4. Wide scan XPS spectra of bismuthene and Au-BiOCl (Figure S4) .....                                                    | S5  |
| 5. Polymerase chain reaction results using <i>Raphidiopsis raciborskii</i> specific DNA probes (Figure S5) .....         | S6  |
| 6. The zeta potential and capacitance results of each nanocomposite (Figure S6) .....                                    | S7  |
| 7. Capacitance value depending on Au-BiOCl synthesis concentration (Figure S7) .....                                     | S8  |
| 8. Capacitance trend at each stage of sensing membrane immobilization (Figure S8) ...                                    | S9  |
| 9. Capacitance measurement results without applying Au-BiOCl (Figure S9) .....                                           | S10 |
| 10. Reproducibility of the fabricated sensor (Figure S10) .....                                                          | S11 |
| 11. Harmful cyanobacteria species used in this study (Table S1) .....                                                    | S12 |
| 12. DNA probes details used in the present study (Table S2) .....                                                        | S12 |
| 13. Species and GenBank accession numbers of non-specific cyanobacteria DNA sequences used in the study (Table S3) ..... | S13 |

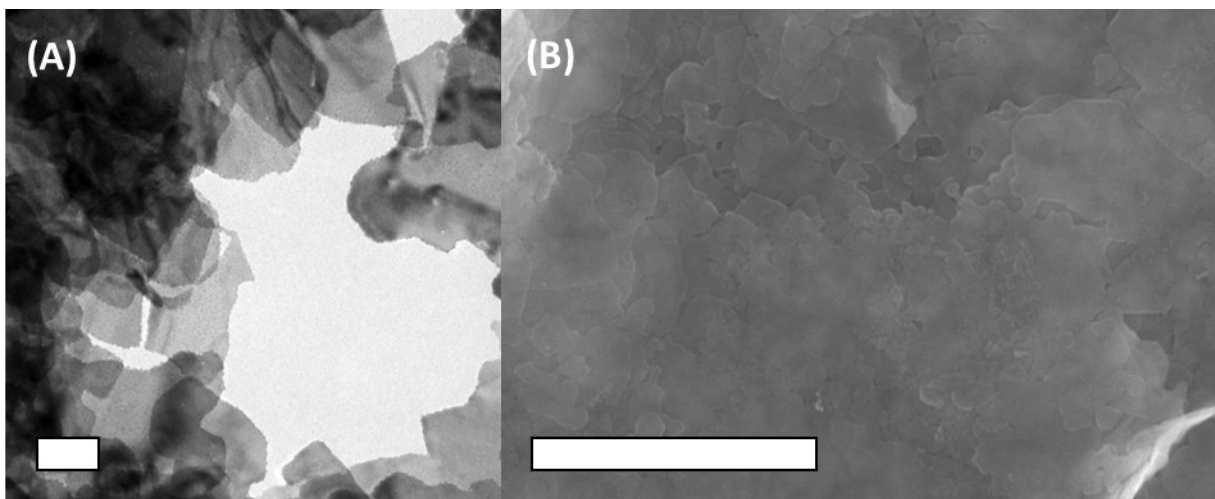

**Figure S1.** Electron microscopic characterization of synthesized bismuthene. (A) Transmission electron microscopy (TEM) and (B) scanning electron microscopy (SEM) image of bismuthene nanosheet. Scale bars = 500 nm.

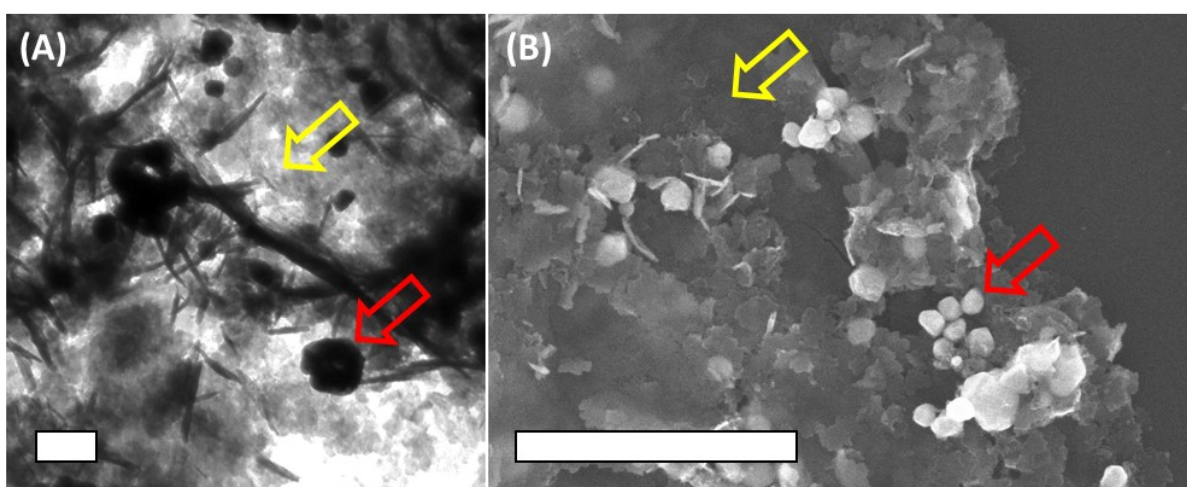

**Figure S2.** Lower magnification images for Au-BiOCl. (A) Transmission electron microscopy (TEM) and (B) scanning electron microscopy (SEM) images exhibited Au-BiOCl nanosheets (yellow arrow mark) and sparsely formed overgrown Au nanoparticles (red arrow mark). Scale bars = 500 nm.

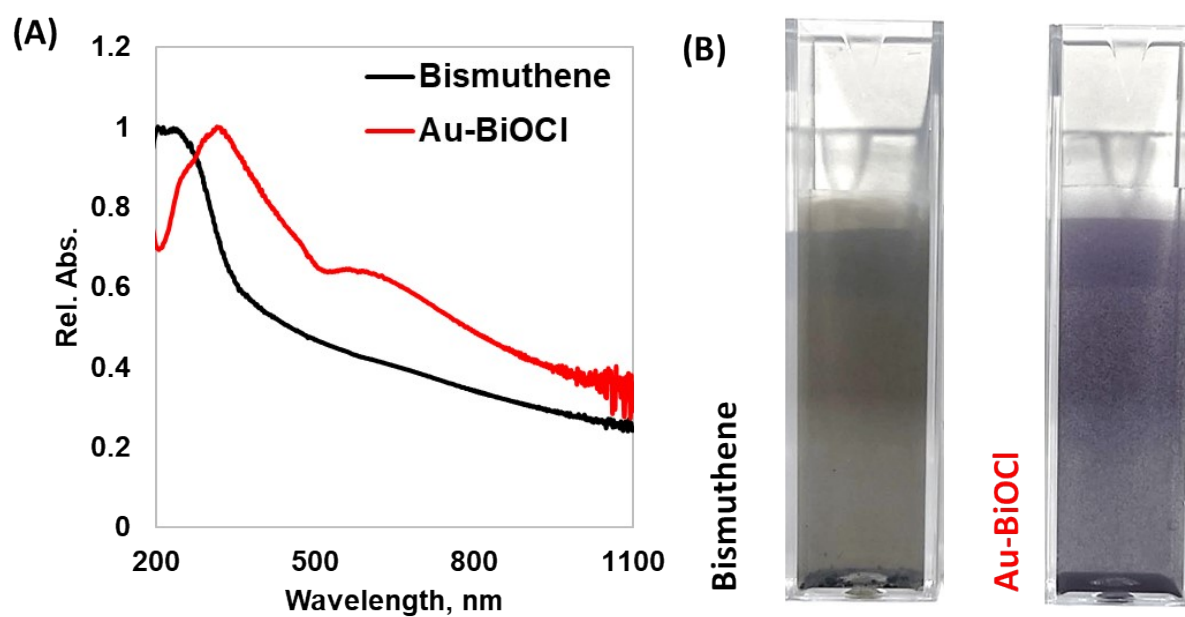

**Figure S3.** Optical characterization of bismuthene and Au-BiOCl. (A) Ultraviolet-visible-near infrared (UV-Vis-NIR) spectra and (B) digital photo image of bismuthene precursor and Au-BiOCl.

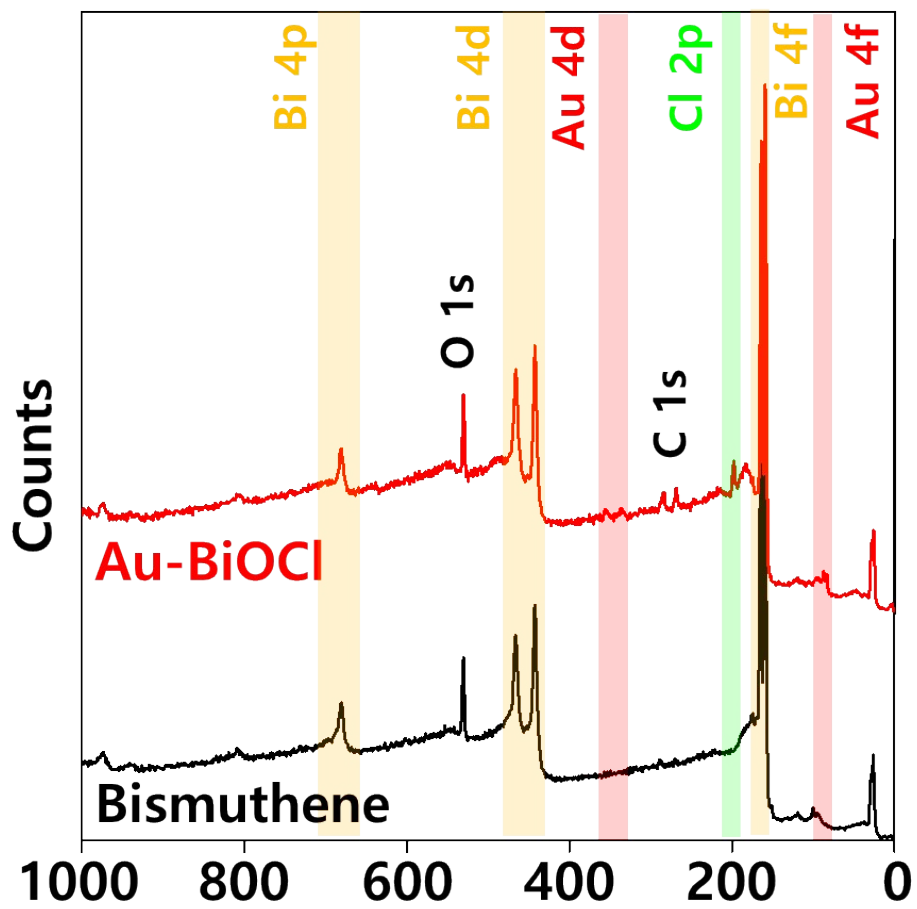

**Figure S4.** Wide scan X-ray photoelectron spectroscopy (XPS) spectra of bismuthene and Au-BiOCl.

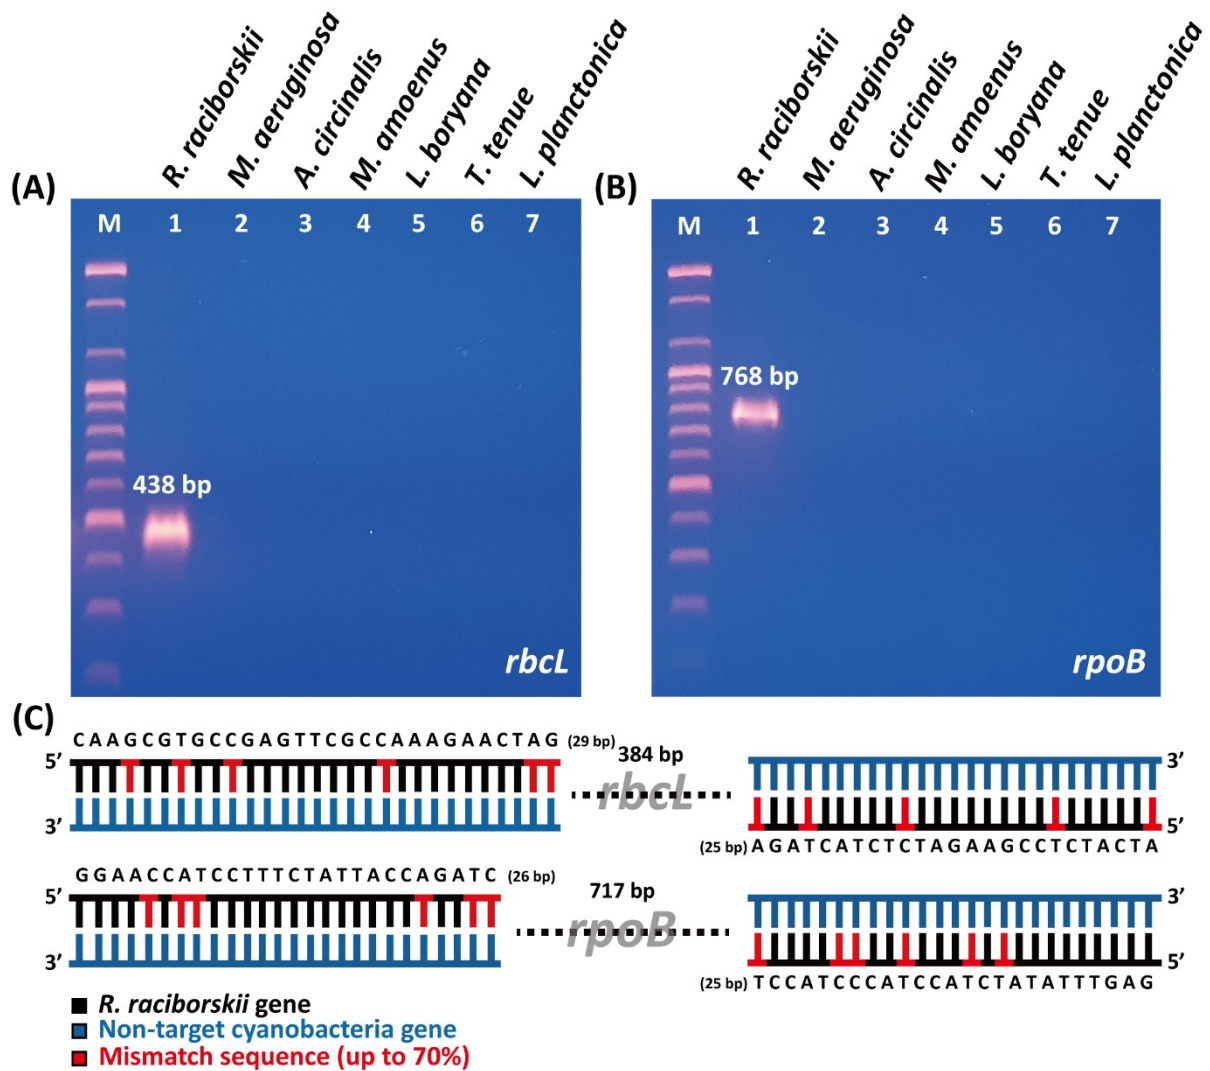

**Figure S5.** Polymerase chain reaction (PCR) results of 7 cyanobacteria DNAs, using the designed *Raphidiopsis raciborskii* specific (A) *RubisCO* large subunit (*rbcL*) and (B) *RNA polymerase beta subunit* (*rpoB*) probes. (C) The mismatched sequences of probe in *rbcL* and *rpoB* compared with non-target cyanobacteria DNA.

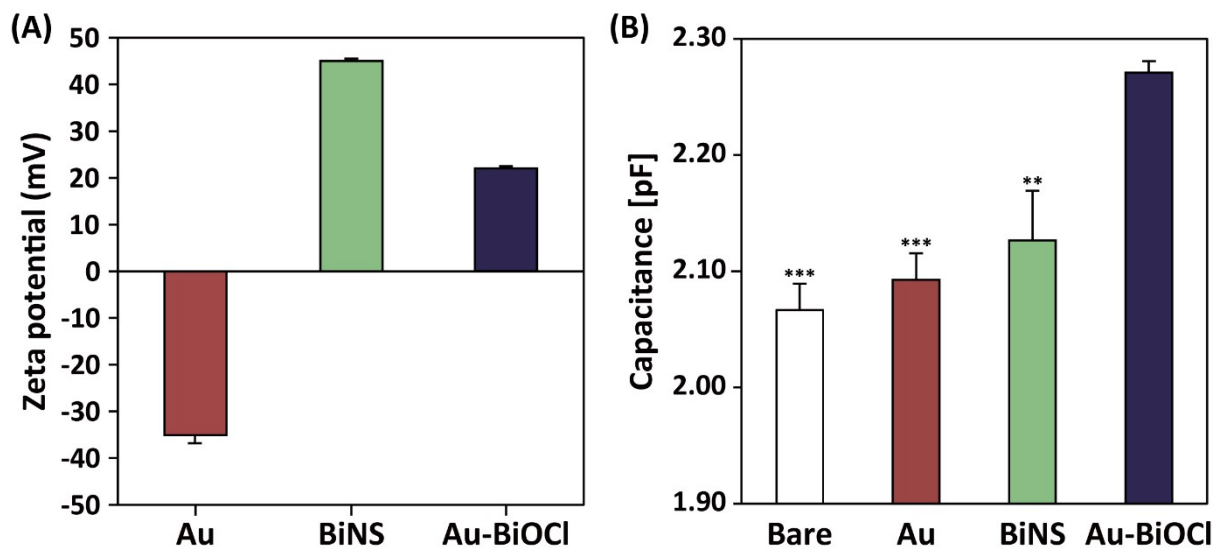

**Figure S6.** The (A) zeta potential and (B) capacitance results of Au nanoparticle, bismuth nanosheet (BiNS), and synthesized Au-BiOCl. Significant differences between the Au-BiOCl and single materials were determined by one-way analysis of variance (ANOVA) and are depicted as  $**p < 0.01$  and  $***p < 0.001$ .

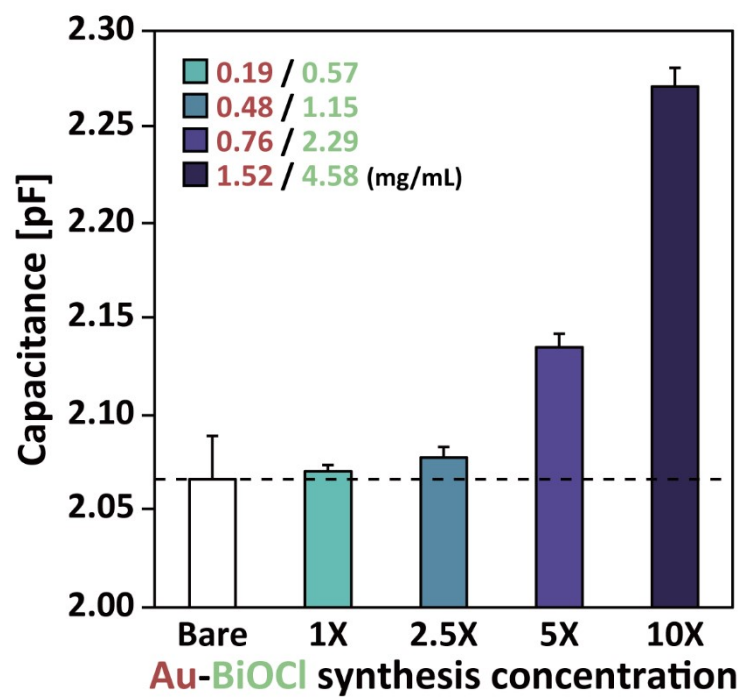

**Figure S7.** Capacitance value depending on Au-BiOCl synthesis concentration.



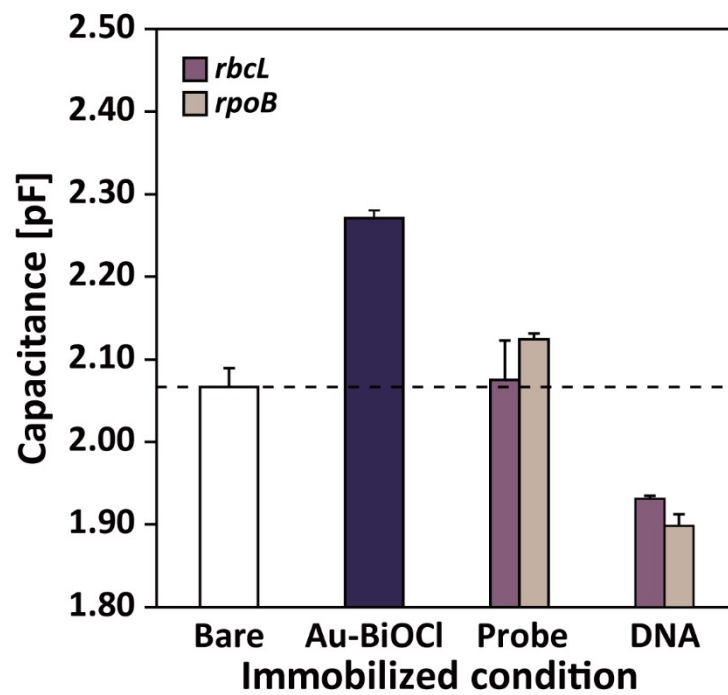

**Figure S8.** Capacitance trend at each stage of sensing membrane immobilization.

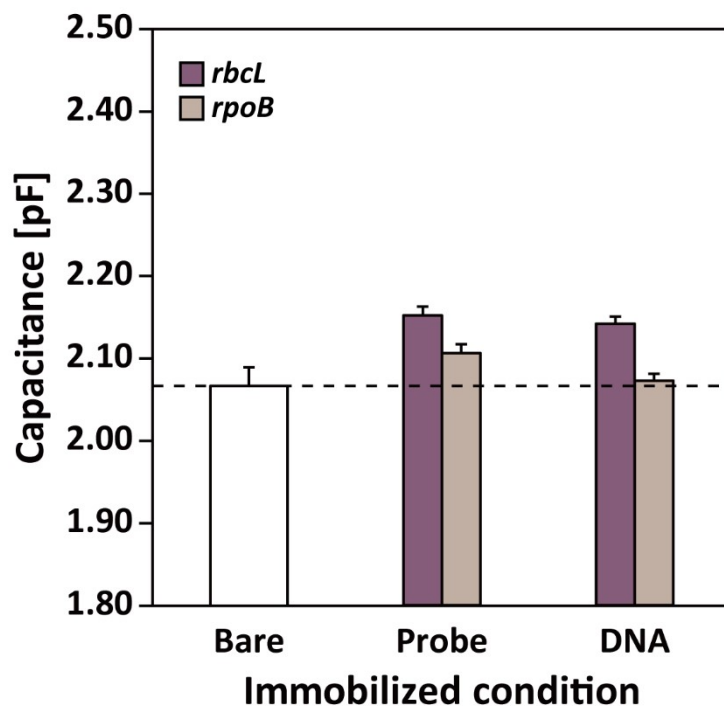

**Figure S9.** Capacitance measurement results without applying Au-BiOCl on the electrode at each immobilized stage in order of bare, probe, and target DNA.

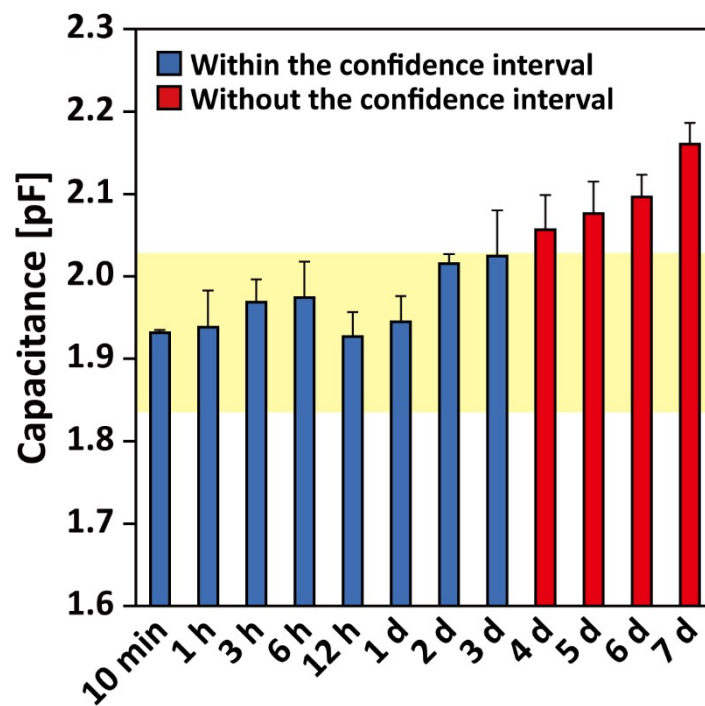

**Figure S10.** The stability of fabricated capacitive-type biosensor. Yellow box represented the electrical signal confidence level of  $\pm 5\%$ .

**Table S1.** Harmful cyanobacteria species used in this study

| Species name                    | Purpose        | Strain code |
|---------------------------------|----------------|-------------|
| <i>Anabaena circinalis</i>      | Control group  | FBCC-A104   |
| <i>Leptolyngbya boryana</i>     | Control group  | FBCC-288    |
| <i>Limnothrix planctonica</i>   | Control group  | FBCC-310    |
| <i>Microcoleus amoenus</i>      | Control group  | FBCC-518    |
| <i>Microcystis aeruginosa</i>   | Control group  | FBCC-A59    |
| <i>Raphidiopsis raciborskii</i> | Target species | FBCC-A1229  |
| <i>Tychonema tenue</i>          | Control group  | FBCC-324    |

**Table S2.** DNA sequence details used in the present study

| Gene                                      | Probe                               | Remark     | Sequence                                           |
|-------------------------------------------|-------------------------------------|------------|----------------------------------------------------|
| <i>RubisCO large subunit (rbcL)</i>       | <i>R. raciborskii</i><br>rbcL-F     | gDNA PCR   | 5'-CAA GCG TGC CGA GTT CGC CAA AGA ACT AG-3'       |
|                                           | <i>R. raciborskii</i><br>rbcL-R     | gDNA PCR   | 5'-ATC ATC TCC GAA GAT CTC TAC TAG A-3'            |
|                                           | <i>R. raciborskii</i><br>rbcL probe | Biosensing | 5' Thiol-CAA GCG TGC CGA GTT CGC CAA AGA ACT AG-3' |
| <i>RNA polymerase beta subunit (rpoB)</i> | <i>R. raciborskii</i><br>rpoB-F     | gDNA PCR   | 5'-GGA ACC ATC CTT TCT ATT ACC AGA TC-3'           |
|                                           | <i>R. raciborskii</i><br>rpoB-R     | gDNA PCR   | 5'-GAG TTT ATA TCT ACC TAC CCT ACC T-3'            |
|                                           | <i>R. raciborskii</i><br>rpoB probe | Biosensing | 5' Thiol-GGA ACC ATC CTT TCT ATT ACC AGA TC-3'     |

**Table S3.** Species and GenBank accession numbers of non-specific cyanobacteria DNA sequences used for specific DNA probe design

| Gene                                      | Species                         | Accession number |
|-------------------------------------------|---------------------------------|------------------|
| <i>RubisCO large subunit (rbcL)</i>       | <i>Raphidiopsis raciborskii</i> | CP091284         |
|                                           | <i>Anabaena</i> sp.             | CP003284         |
|                                           | <i>A. cylindrica</i>            | CP003659         |
|                                           | <i>Anabaenopsis elenkinii</i>   | CP063311         |
|                                           | <i>Dolichospermum</i> sp.       | CP043056         |
|                                           |                                 | CP050884         |
|                                           | <i>Microcystis aeruginosa</i>   | AM157793         |
|                                           |                                 | CP089094         |
|                                           | <i>Nodularia sphaerocarpa</i>   | CP060140         |
|                                           | <i>N. spumigena</i>             | CP007203         |
| <i>RNA polymerase beta subunit (rpoB)</i> | <i>Raphidiopsis raciborskii</i> | CP073250         |
|                                           |                                 | CP051188         |
|                                           |                                 | CP051528         |
|                                           | <i>Aphanizomenon flos-aquae</i> | JACJRO010000017  |
|                                           |                                 | KI928194         |
|                                           |                                 | CP050882         |
|                                           | <i>Dolichospermum</i> sp.       | CP050884         |
|                                           |                                 | CP070233         |
|                                           | <i>D. circinale</i>             | KE384612         |
|                                           |                                 | KE384713         |
| <i>Nodularia</i> sp.                      | REBL01000112                    |                  |
| <i>N. spumigena</i>                       | CP020114                        |                  |
